# Supplementary material
Source: PubMed Central journal article supplement (PMC2234172)

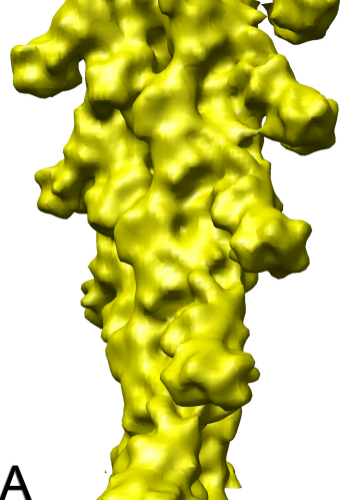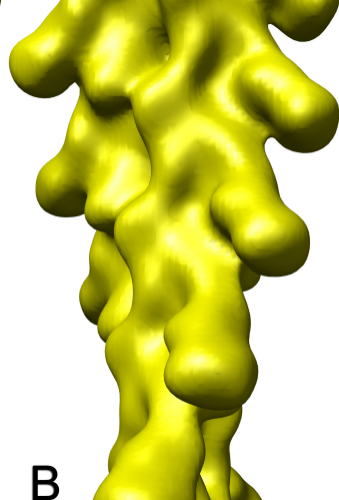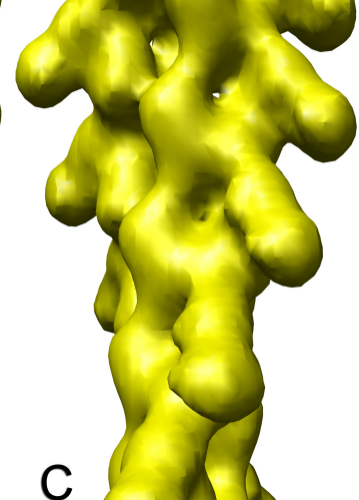

Supplement: pnas_0708667105_2.pdf [file pnas_0708667105_2.pdf]
